# Supplementary material for: High-Energy Supplemental Feeding Shifts Gut Microbiota Composition and Function in Red Deer (Cervus elaphus)
Source: MDPI journal article supplement (doi:10.3390/ani14101428), 2024-05-10
Supplement: s1 [file s1]

Table S1 Composition of the diets during in winter

| Item                 | Mass (kg) |
|----------------------|-----------|
| corn                 | 68        |
| bran (esp. of wheat) | 15        |
| Sunflower seed       | 10        |
| Bentonite            | 1.5       |
| calcium bicarbonate  | 2         |
| salt                 | 1         |
| trace element        | 1         |
| Alfalfa Grass Powder | 1.5       |

The figures in the table are the weight of each nutrient species per 100 kg, except for 75 kg of water per 100 Kg.

Table S2 Analysis of differential gut microbiota (Species) contribution between non-supplementary feeding season and supplementary feeding season.

| Species                                | average  | sd       | ratio    | ava      | avb      | cumsum   | <i>P</i> |
|----------------------------------------|----------|----------|----------|----------|----------|----------|----------|
| <i>Clostridium sp000753455"</i>        | 0.01969  | 0.024935 | 0.789651 | 3.889571 | 0.639024 | 0.077175 | 0.065    |
| <i>Streptococcus thermophilus</i>      | 0.009335 | 0.006978 | 1.337773 | 2.393718 | 1.256996 | 0.113763 | 0.071    |
| <i>Akkermansia muciniphila</i>         | 0.008248 | 0.009228 | 0.893852 | 1.597044 | 0.612222 | 0.146092 | 0.117    |
| <i>Escherichia flexneri</i>            | 0.007724 | 0.011842 | 0.652255 | 0.39971  | 1.588175 | 0.176366 | 0.016    |
| <i>Rikenella microfus</i>              | 0.006472 | 0.003904 | 1.657727 | 4.608547 | 5.820269 | 0.201734 | 0.001    |
| <i>Succinivibrio dextrinosolvens_A</i> | 0.005476 | 0.007423 | 0.737699 | 0.005128 | 1.099795 | 0.223197 | 0.001    |
| <i>Unclassified</i>                    | 0.004983 | 0.00366  | 1.361566 | 9.849822 | 10.39452 | 0.242727 | 0.007    |
| <i>Muribaculum intestinale</i>         | 0.004389 | 0.002955 | 1.485221 | 3.315796 | 4.102524 | 0.259929 | 0.001    |
| <i>Lactobacillus crispatus</i>         | 0.003668 | 0.008883 | 0.412861 | 0.387721 | 0.429339 | 0.274305 | 0.551    |
| <i>Proteiniphilum sp012837345</i>      | 0.00348  | 0.003182 | 1.093377 | 1.387824 | 1.35286  | 0.287942 | 0.694    |

Note: ava: Mean abundance of differential gut microbiota in the NSF: avb: Mean abundance of differential gut microbiota in the SF cumsum: Proportion of cumulative between-group differences contributing

### Percentage of the phyla in core microbiome

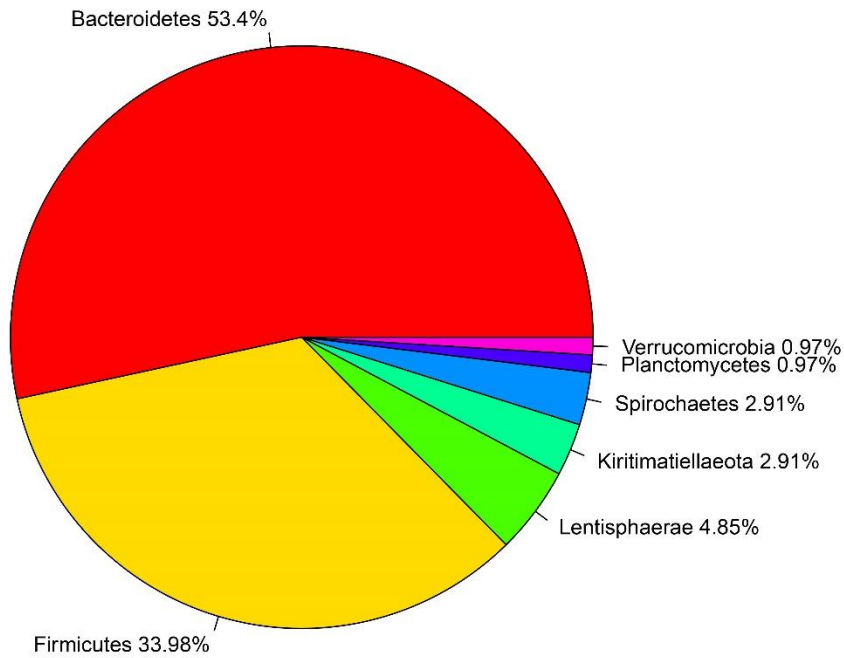

Figure S1 Percentage of the phyla in core microbiome

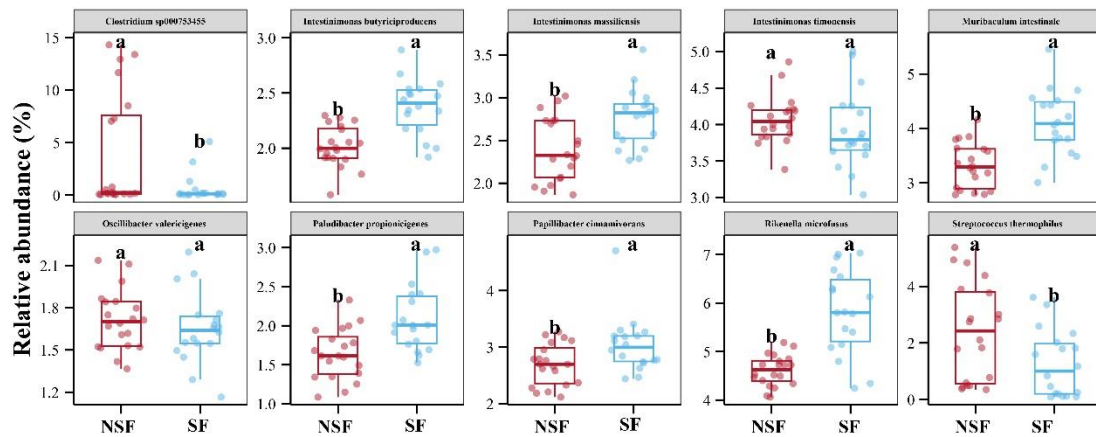

Figure S2 Significant differences between groups (NSF: non-supplementary feeding season; SF: supplementary feeding season) of relative abundance of species in Top10 species.

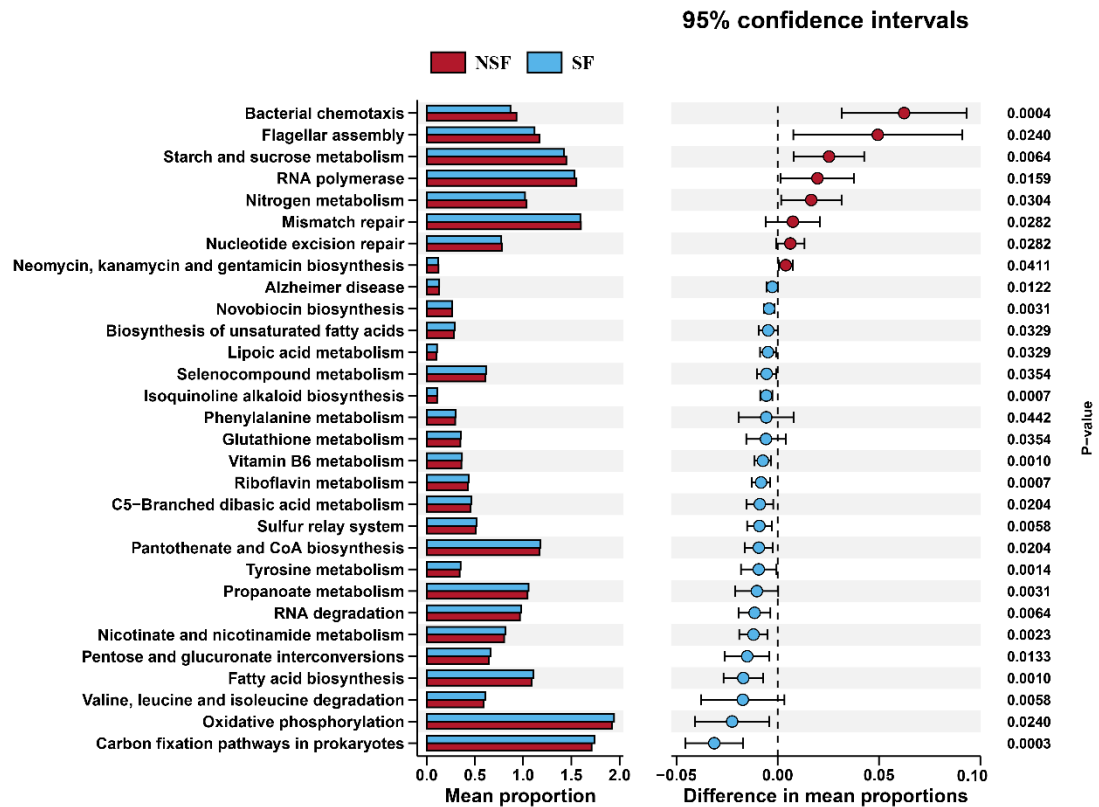

Figure S3. The significant functional difference analyses of red deer gut microbiota in the KEGG level 3 pathway (NSF: non-supplementary feeding season; SF: supplementary feeding season,  $p < 0.05$ )
